# Supplementary material
Source: Springer Nature journal article supplement (https://www.springermedizin.de/resource/supplementary/13054_2012_1778_MOESM4_ESM.pdf/9711694)

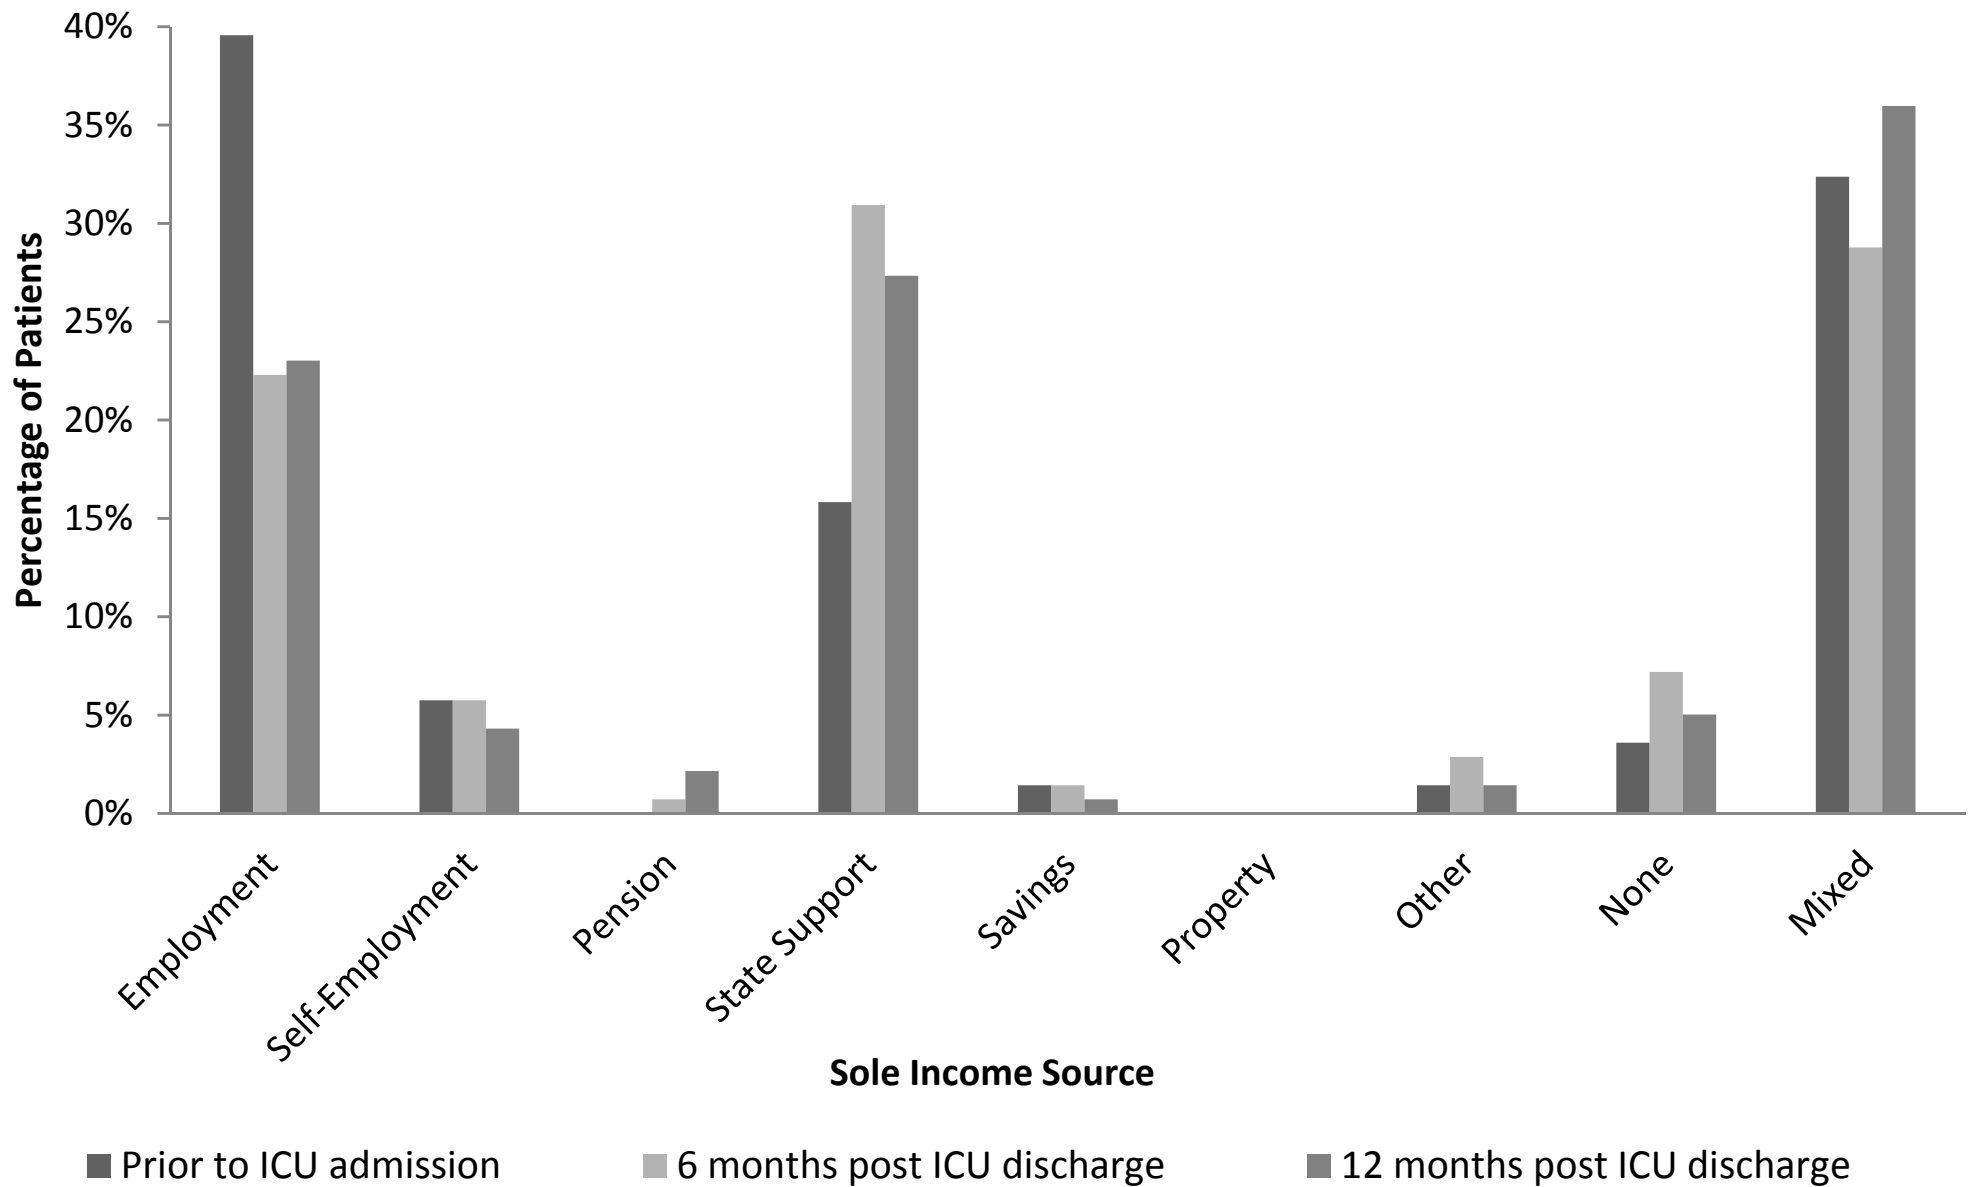

Supplement: MOESM4 [file 9711694]
